# Supplementary figures and images for: Comparative Genomics of Eight Fusarium graminearum Strains with Contrasting Aggressiveness Reveals an Expanded Open Pangenome and Extended Effector Content Signatures
Source: MDPI journal article supplement (doi:10.3390/ijms22126257), 2021-06-10

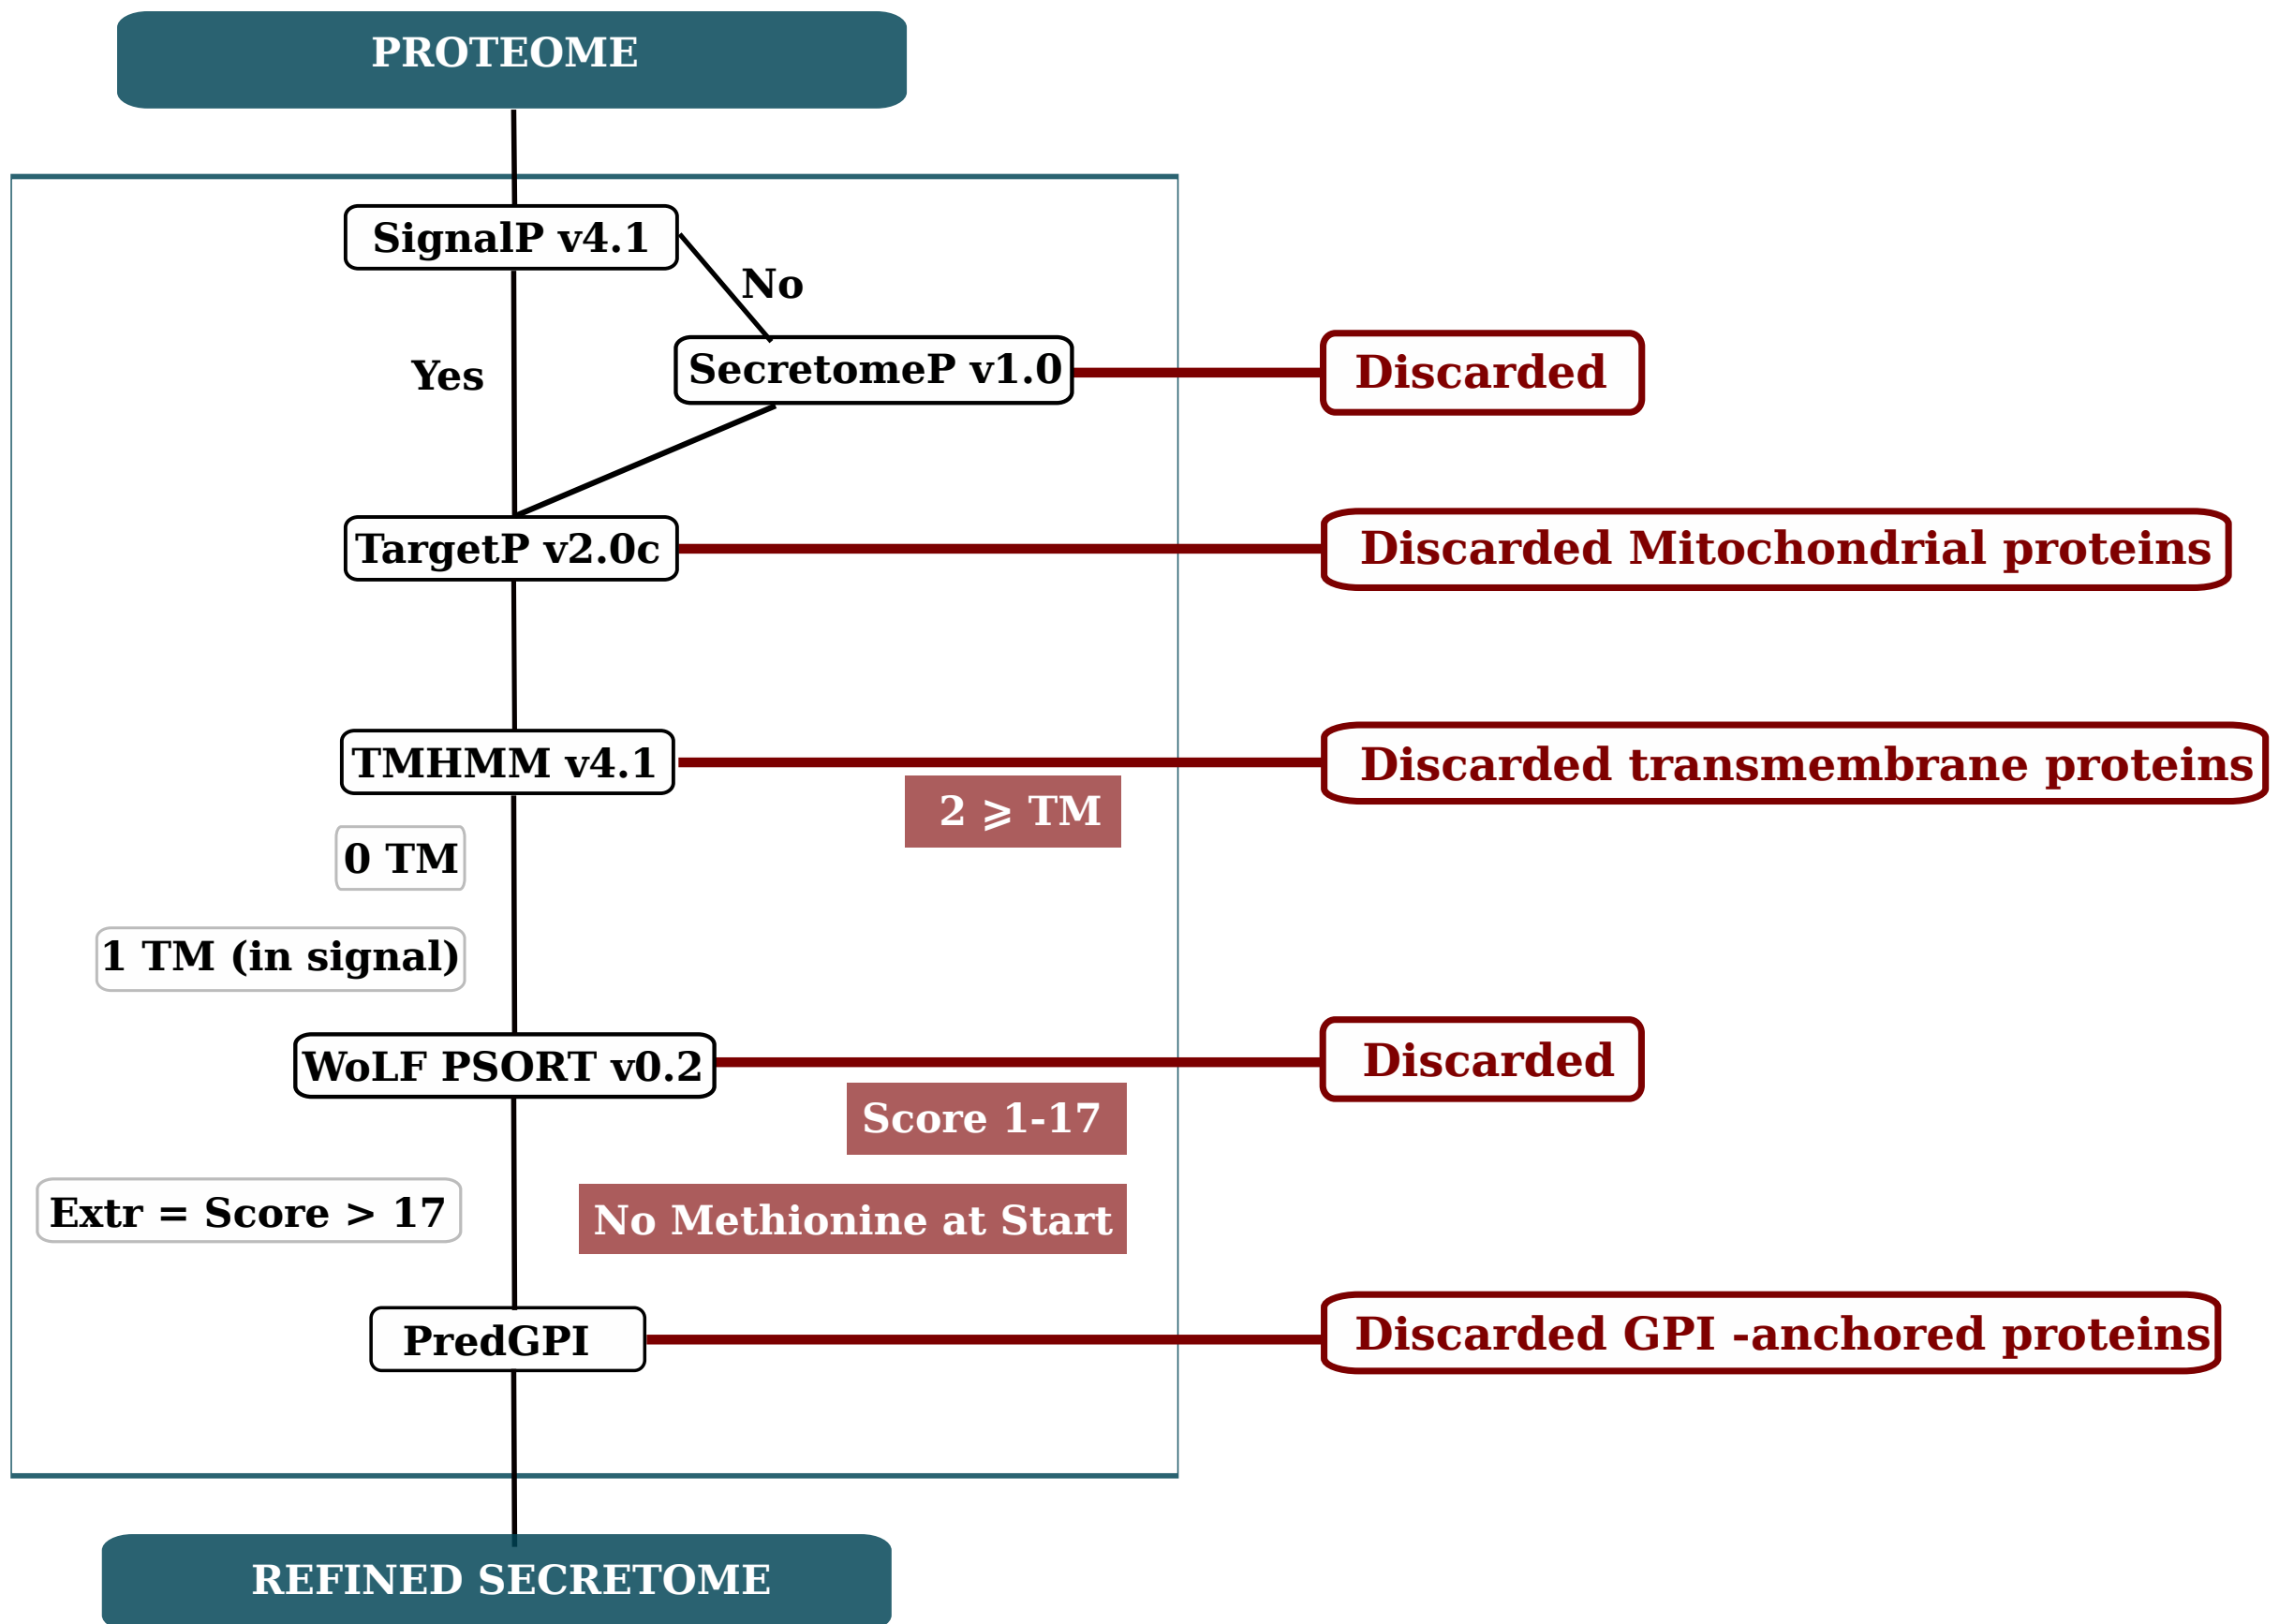

Supplement: s1 [file s1]

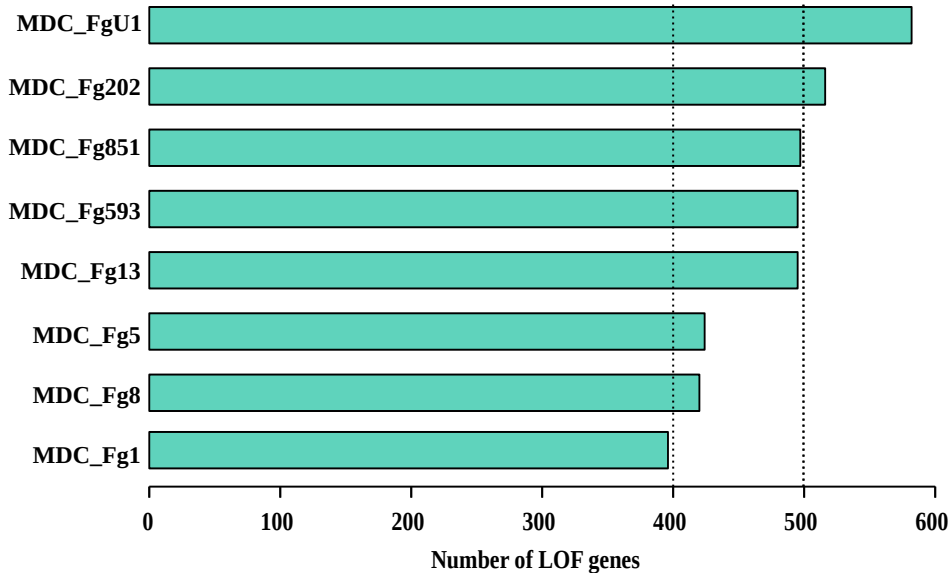

Supplement: s1 [file s1]

Fig.S2

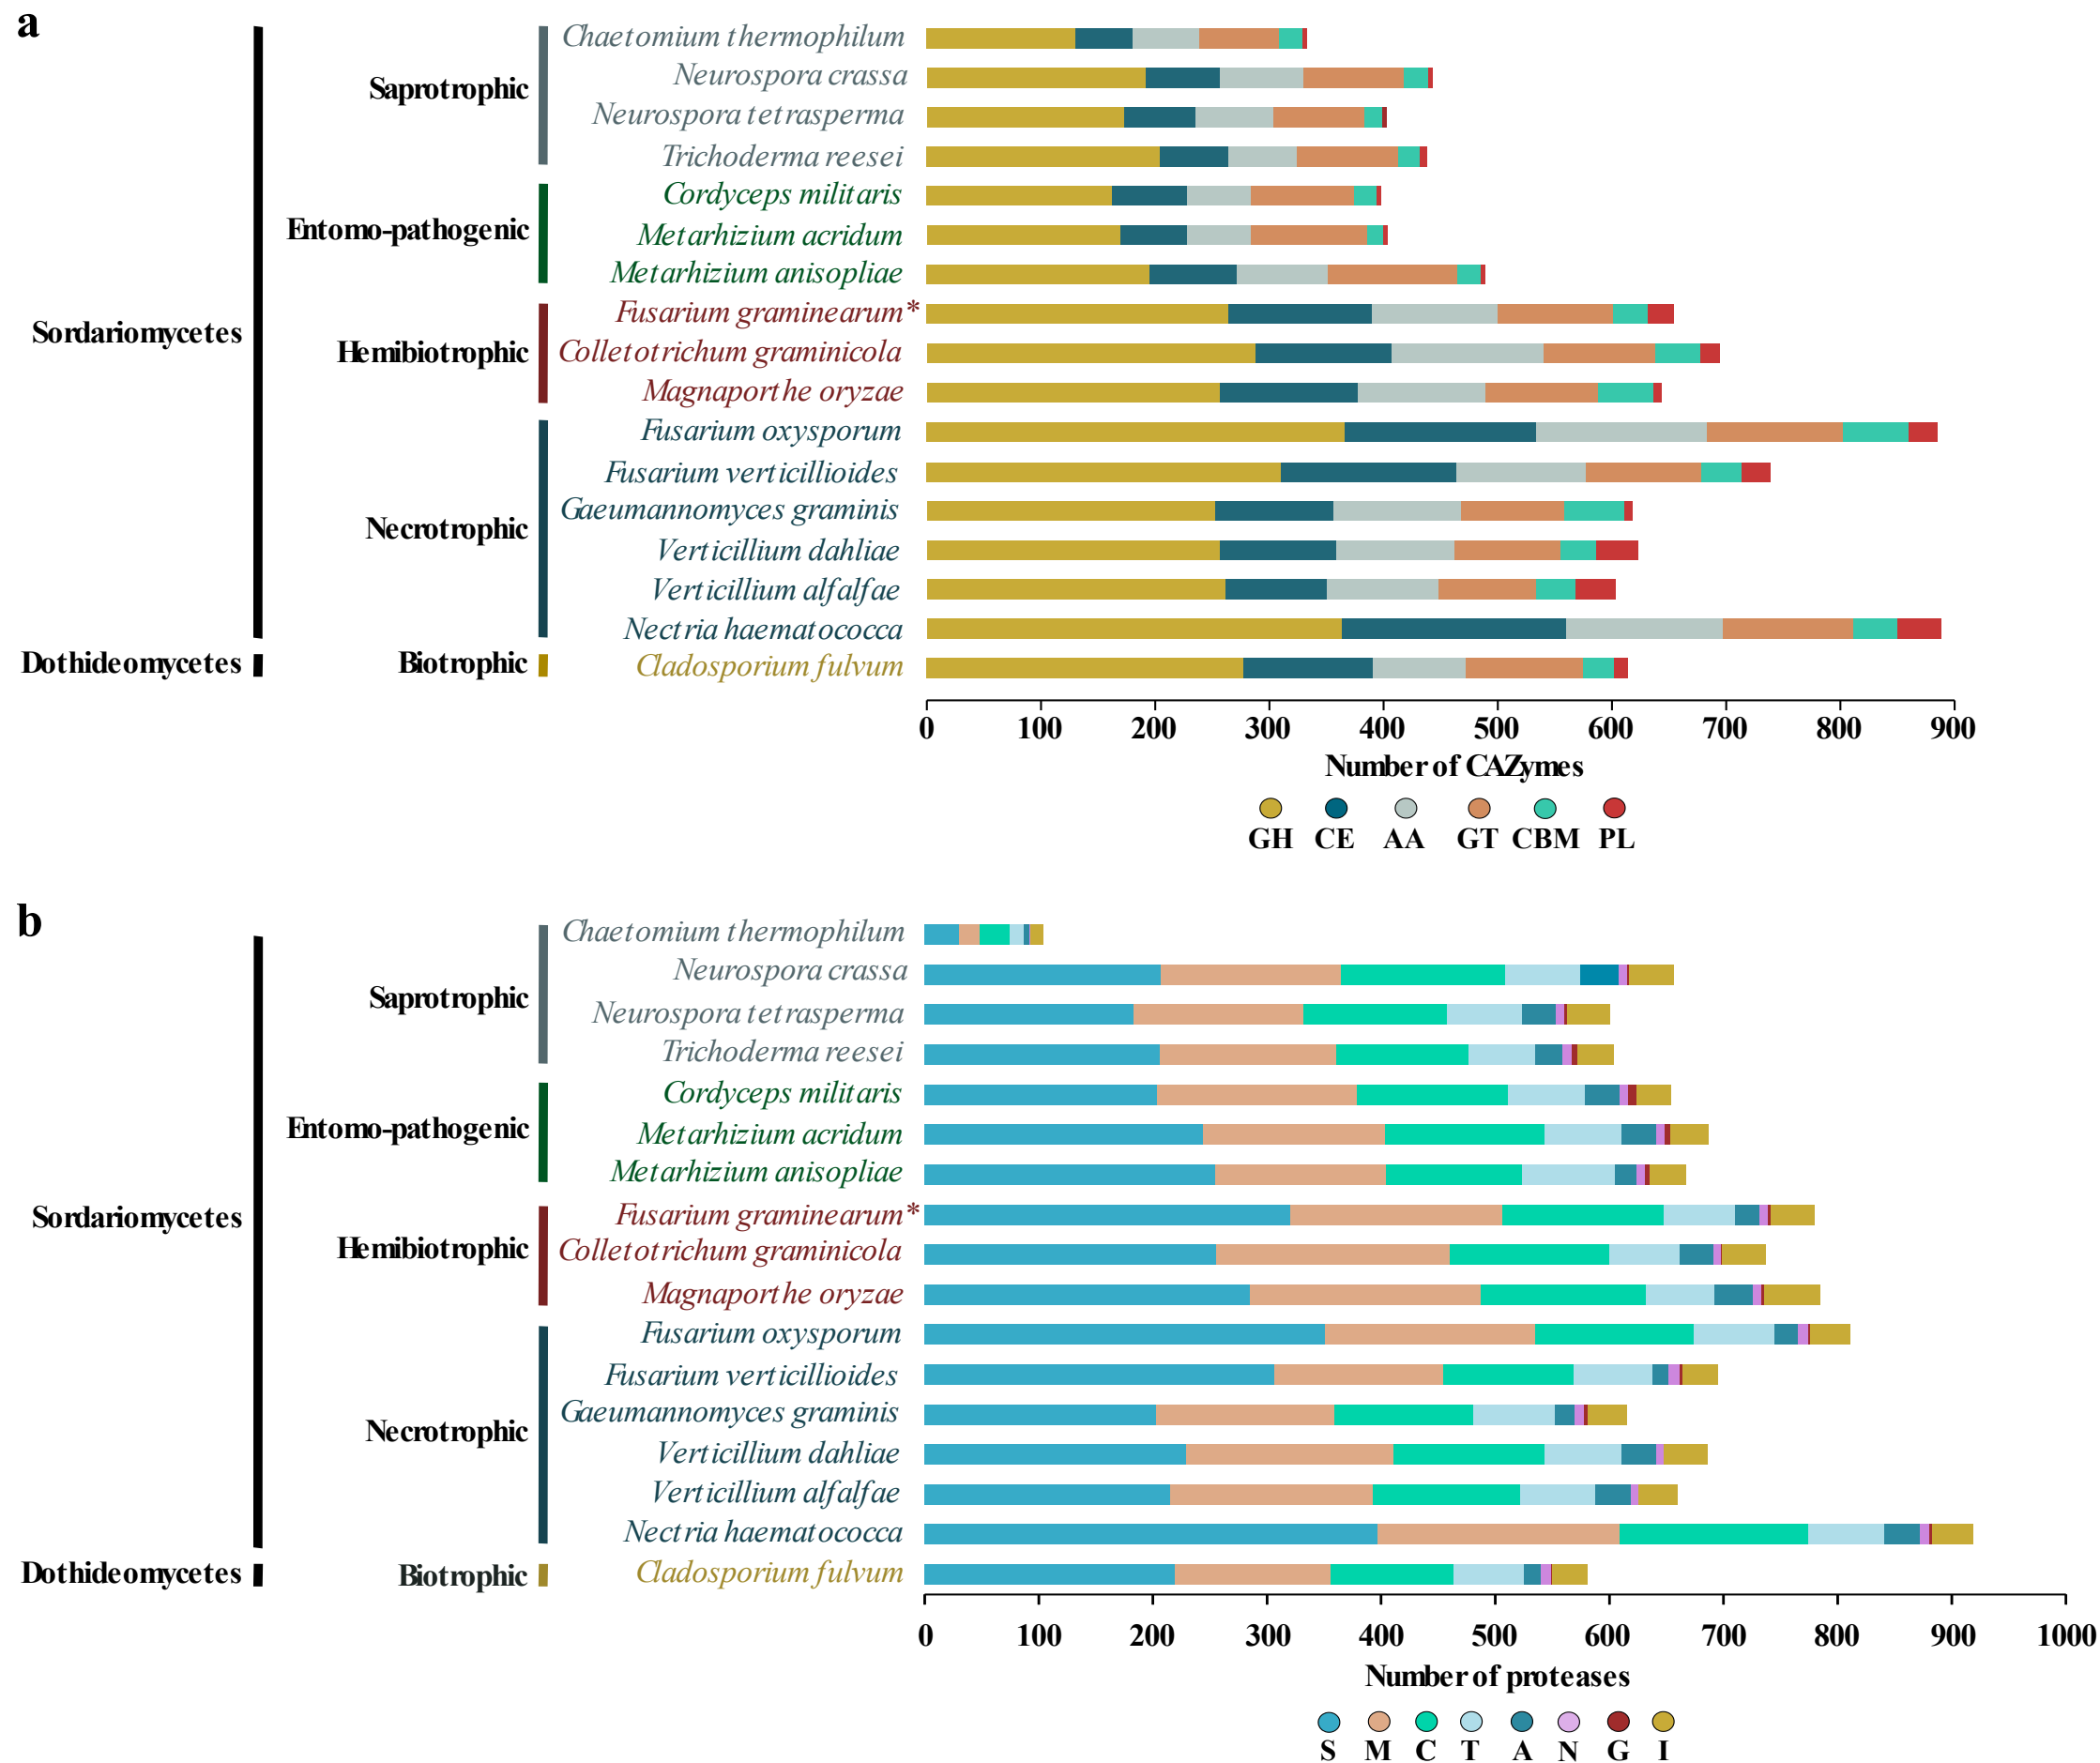

Supplement: s1 [file s1]
